# Supplementary material for: The protonation state of thiols in self-assembled monolayers on roughened Ag/Au surfaces and nanoparticles
Source: Royal Society of Chemistry journal article supplement (doi:10.1039/c5cp04450b), 2015-01-01
Supplement: c5cp04450b1.pdf [file c5cp04450b1.pdf]

## **Supporting Information**

### **Protonation State of Thiols in Self-Assembled Monolayers on Roughened Ag/Au Surfaces and Nanoparticles**

Sabyasachi Bandyopadhyay, Samir Chattopadhyay, Abhishek Dey\*

Department of Inorganic Chemistry, Indian Association for the Cultivation of Science,  
Kolkata, West Bengal, India-700032

FIGURES

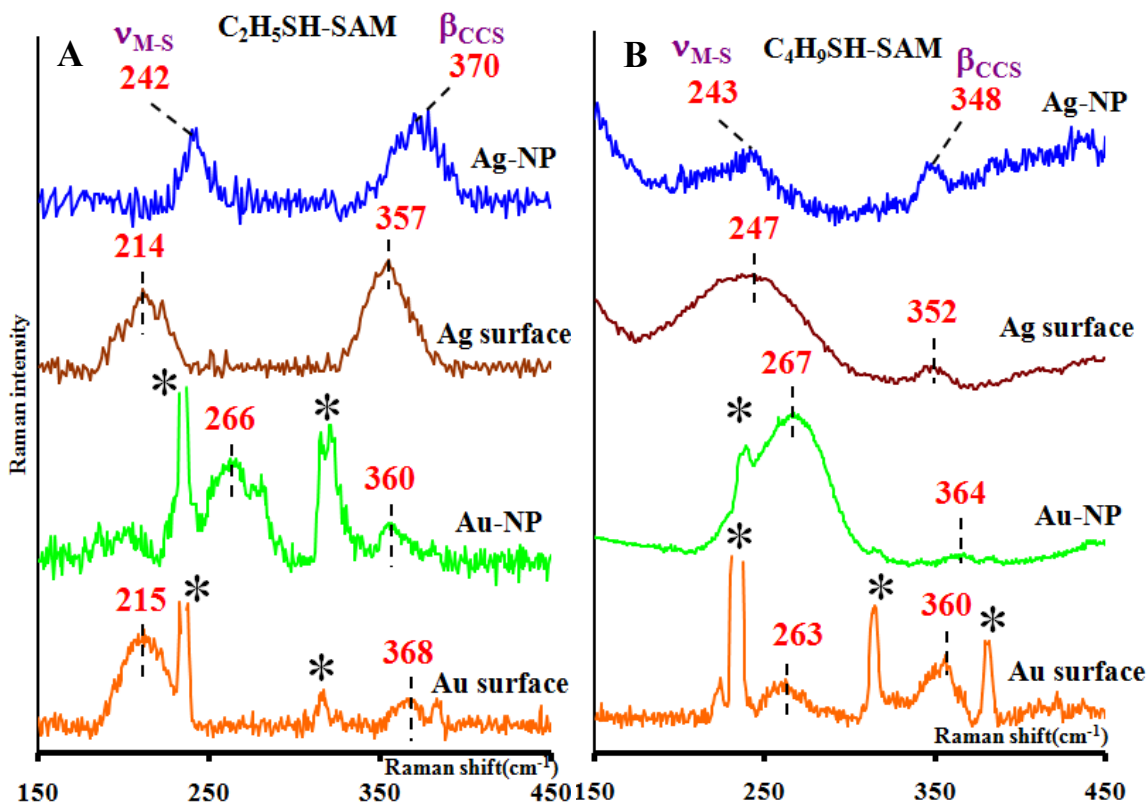

**Fig. S1** Low range SER spectra for short chain alkylthiols adsorbed on Ag, Au surfaces and nanoparticles. A) Spectra for  $\text{C}_2\text{SH}$  SAM and B) spectra for  $\text{C}_4\text{SH}$  SAM. \* represents plasma lines.

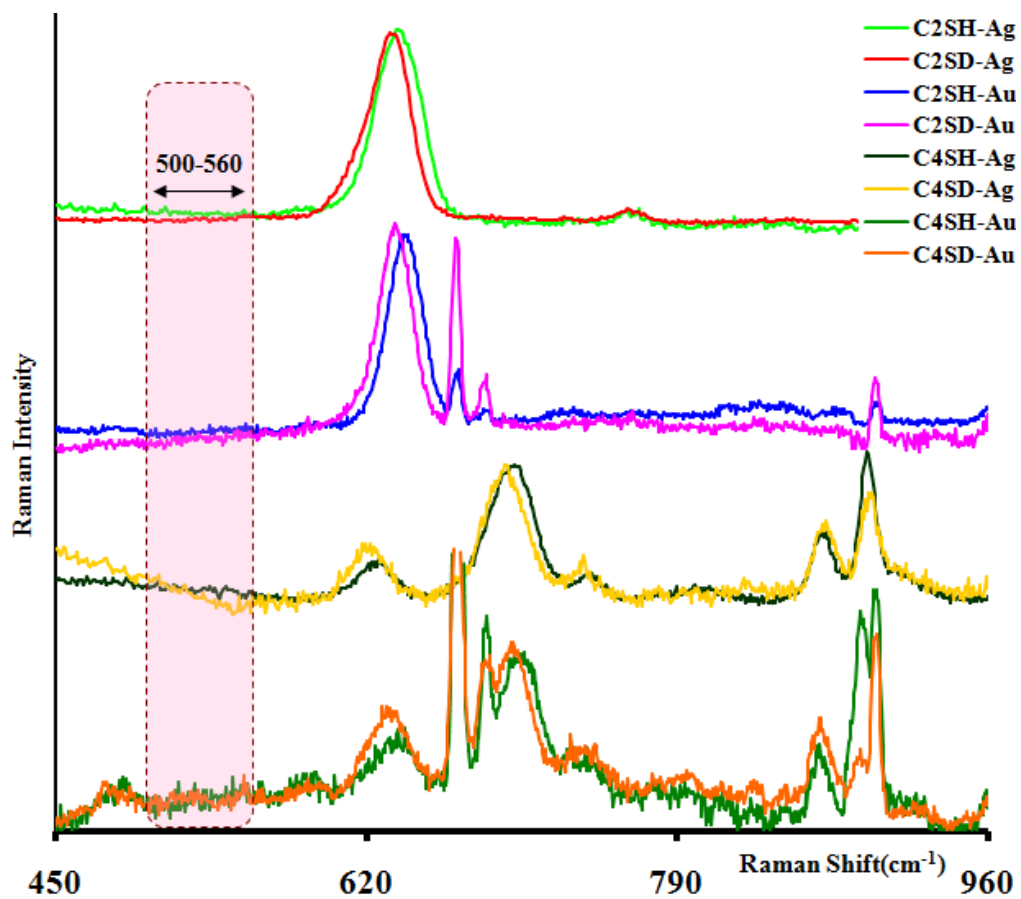

**Fig. S2** SER spectra for alkylthiols adsorbed on Ag and Au surfaces. The highlighted region indicates that any peak for S-S stretching frequency is absent for these surface adsorbed molecules.

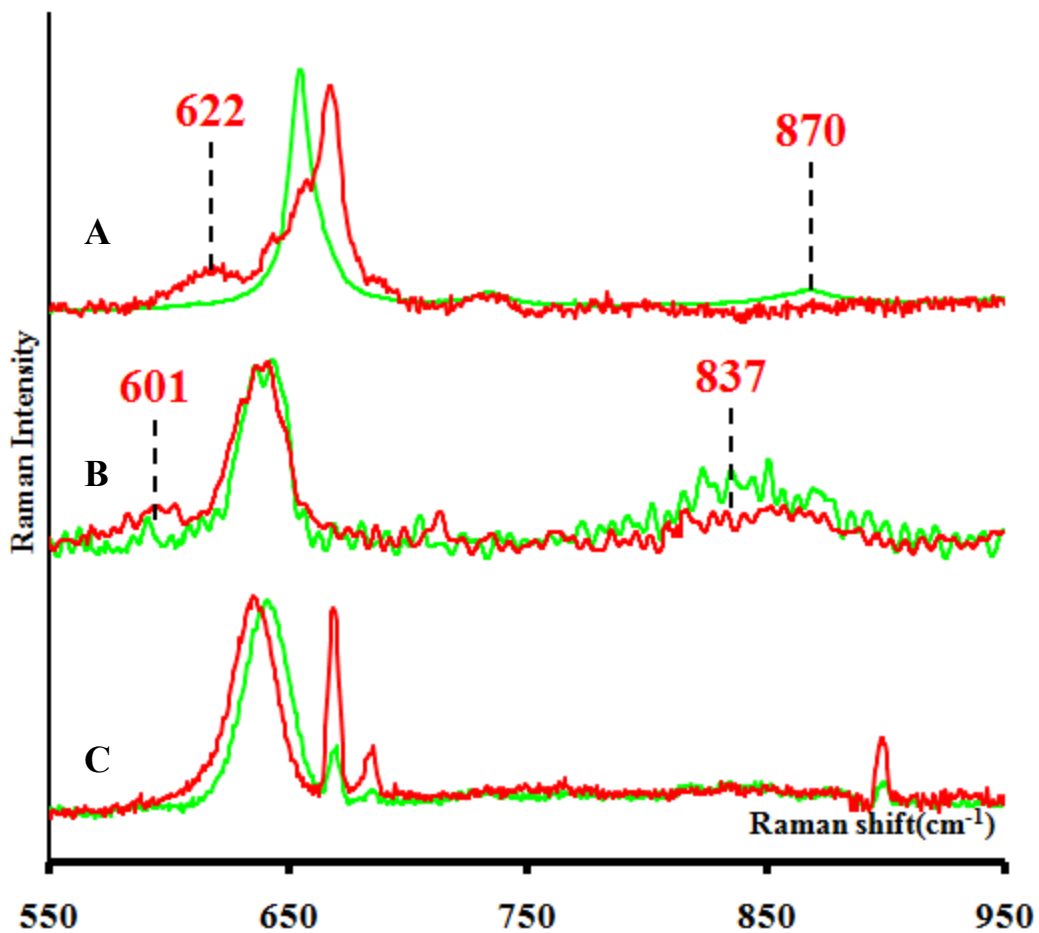

**Fig. S3** Raman spectra of C<sub>2</sub>H<sub>5</sub>SH (green) and C<sub>2</sub>H<sub>5</sub>SD (red) (A) in solution and (B-C) on Au surfaces (SERS). (B) SERS of physisorbed thiol SAMs (monolayer deposited surfaces without washing by any solvents) (C) SERS of chemisorbed thiol SAMs (monolayer deposited surfaces after thorough washing with EtOH and CHCl<sub>3</sub>).

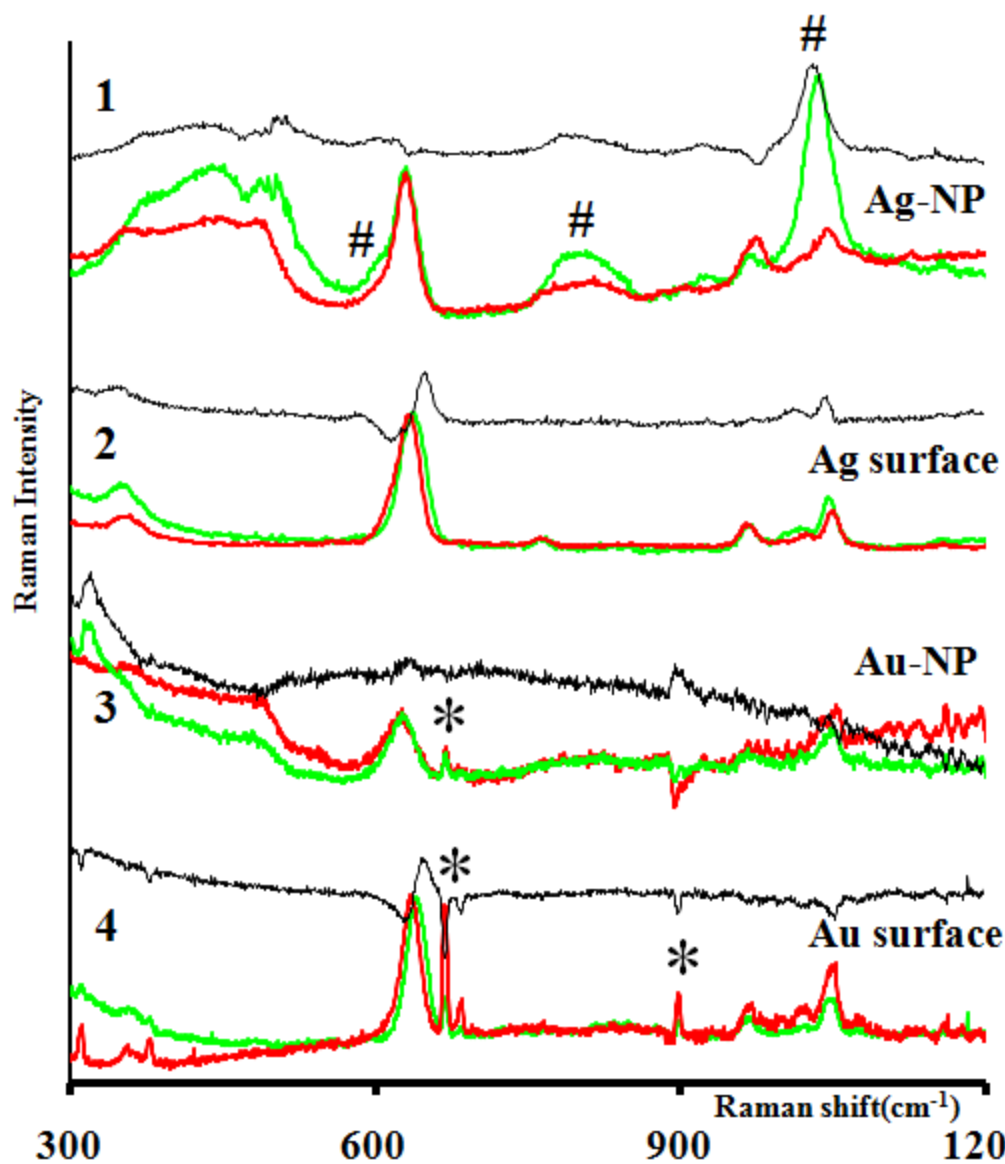

**Fig. S4** Full range SER spectra for ethanethiol adsorbed on Ag, Au surfaces and NPs. \* represents plasma lines. # represent solvent peaks.

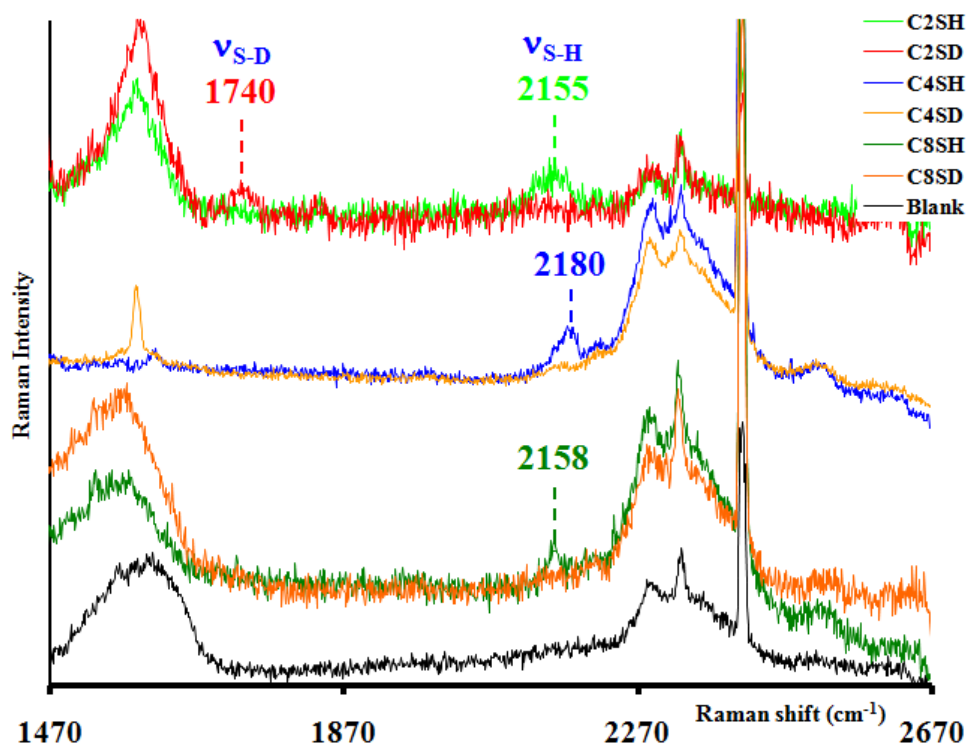

**Fig. S5** SER spectra in high range (1470 – 2670 cm<sup>-1</sup>) for short and moderate chain alkyl thiols adsorbed on Ag surfaces.

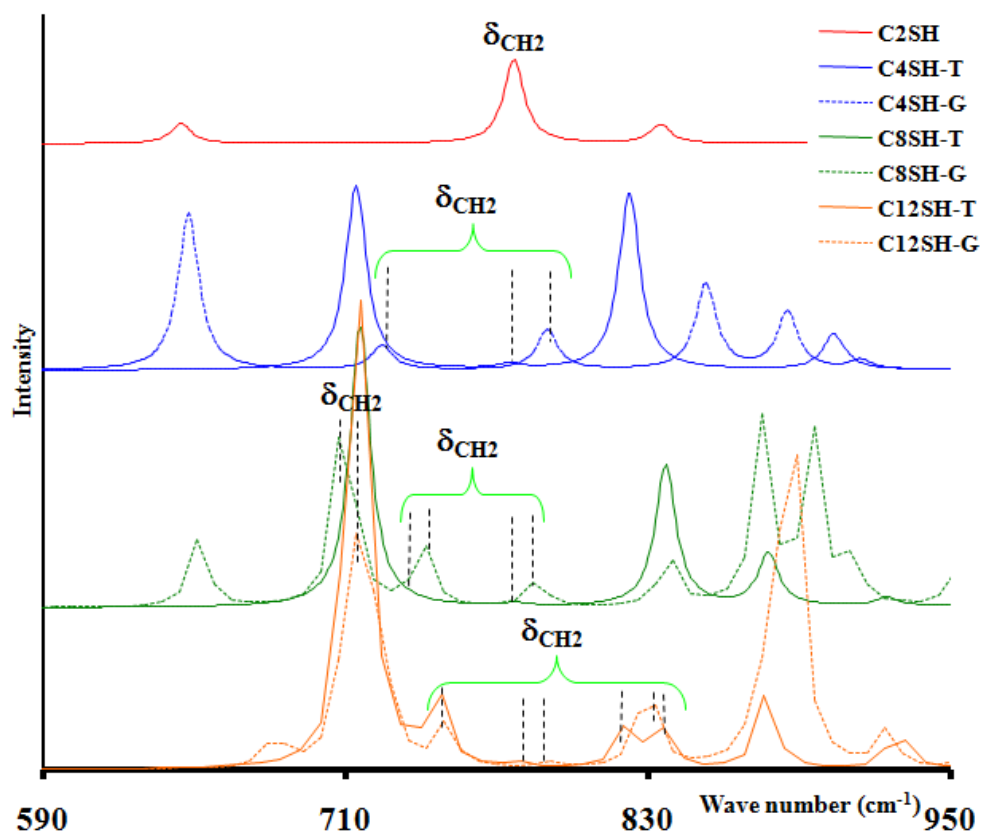

**Fig. S6** DFT calculated wave numbers of alkyl thiols. Methylene rocking modes ( $\delta_{\text{CH}_2}$ ) are shown here. T and G mean trans and gauche conformations, respectively. The details of DFT calculation and peak assignments are reported in *Analyst*, 2014, **139**, 2118-2121.

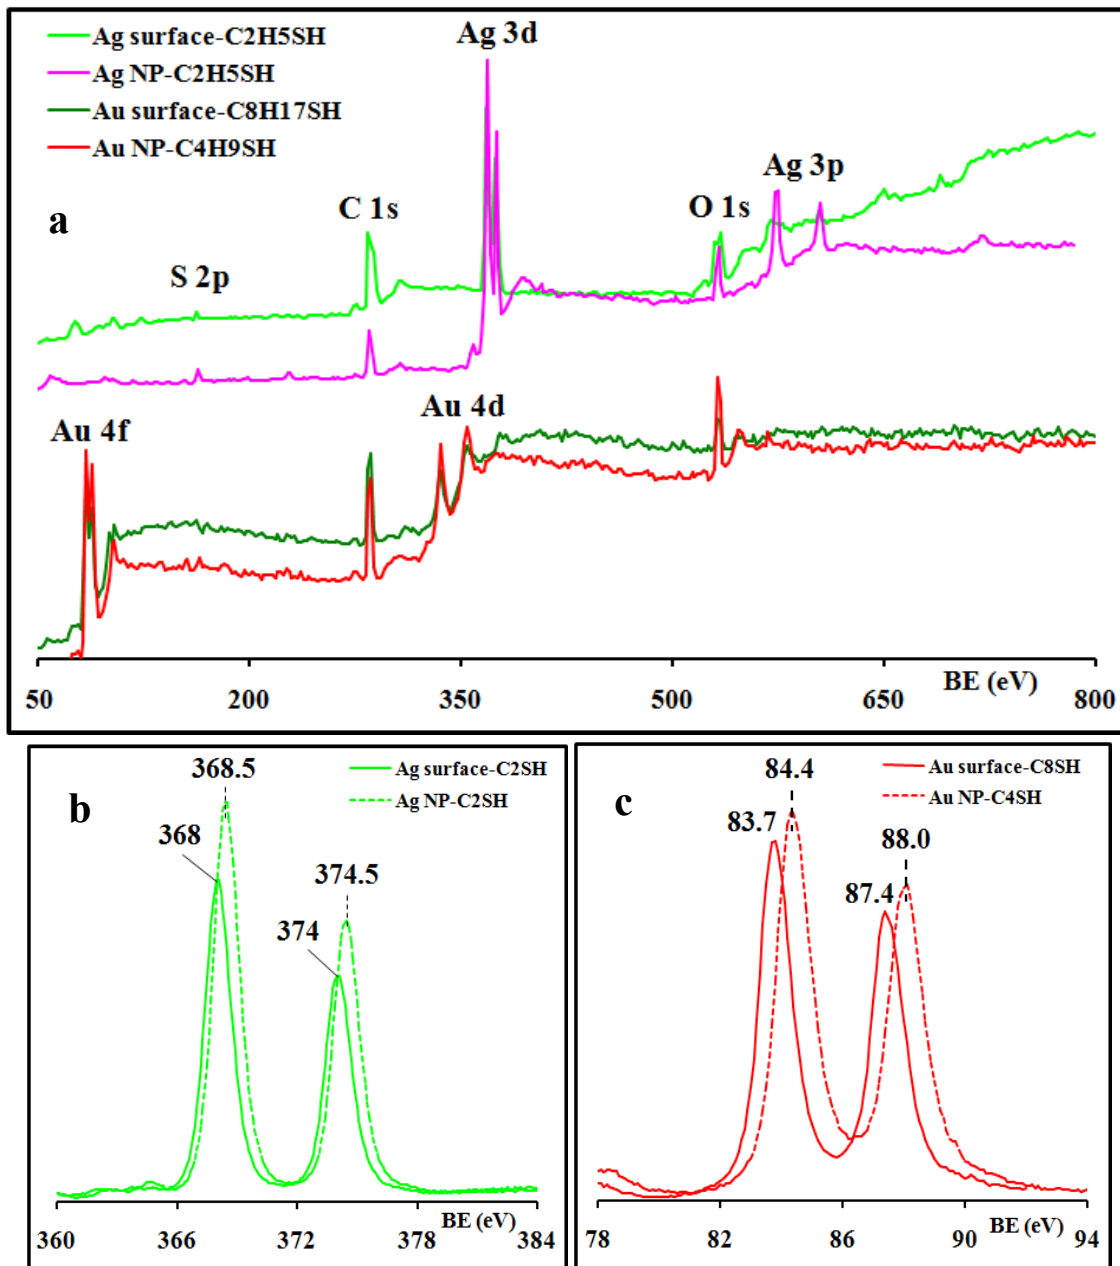

**Fig. S7** (a) Full range XP spectra for C<sub>2</sub>H<sub>5</sub>SH bound Ag surfaces and NPs (top) and C<sub>8</sub>H<sub>17</sub>SH bound Au surfaces and C<sub>4</sub>H<sub>9</sub>SH bound Au NPs (bottom). (b) High-resolution XP spectra of Ag for C<sub>2</sub>H<sub>5</sub>SH bound Ag surfaces and NPs and (c) same of Au for C<sub>8</sub>H<sub>17</sub>SH bound Au surfaces and C<sub>4</sub>H<sub>9</sub>SH bound Au NPs.

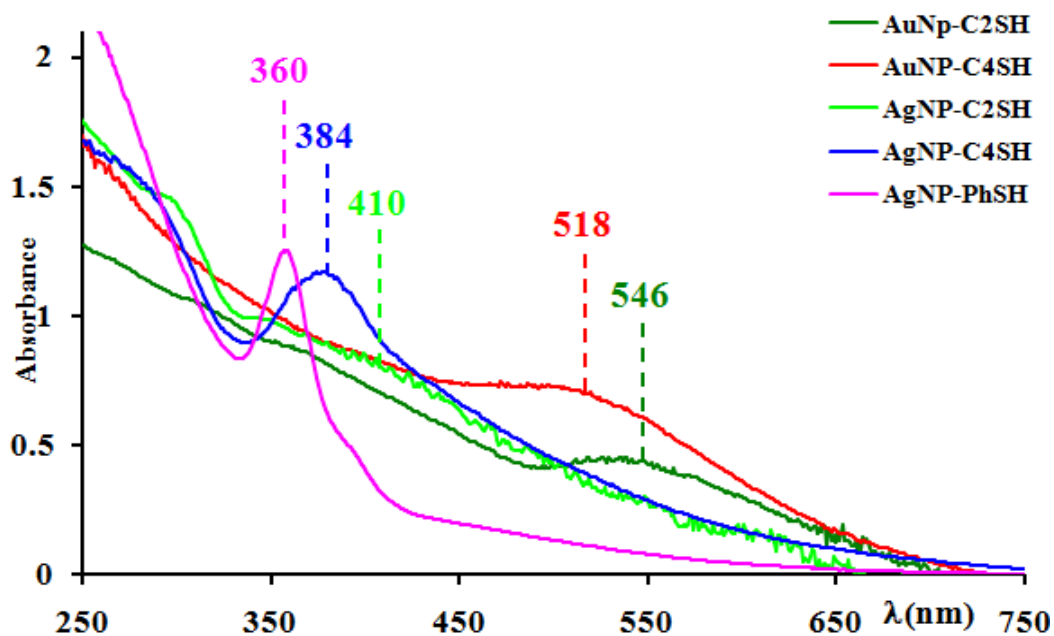

**Fig. S8** Absorbance spectra of aromatic and alkyl thiol capped Ag and Au nanoparticles solubilized in MeOH.

**Table S1.** Ordinary Raman and Surface Enhanced Raman vibrational assignments of an aromatic thiol and some aliphatic thiols adsorbing them on Ag and Au nanoparticles.

|                      | Solution    | Ag-NP       | Au-NP     | Assignment        |
|----------------------|-------------|-------------|-----------|-------------------|
| C <sub>2</sub> SH(D) | 654 (671)   | 631 (631)   | 628 (628) | $\nu_{CS}$        |
|                      | 870 (622)   |             |           | $\beta_{CSH/CSD}$ |
| PhSH(D)              | 284 (275)   | 336 (336)   |           | $\beta_{CS}$      |
|                      | 414 (414)   | 425 (425)   |           | $\nu_{CS}$        |
|                      | 617 (617)   | 616 (616)   |           | $\nu_{CS}$        |
|                      | 698 (703)   | 695 (695)   |           | $\nu_{CS}$        |
|                      | 918 (680)   | -           |           | $\beta_{CSH/CSD}$ |
|                      | 1094 (1094) | 1078 (1078) |           | $\nu_{CS}$        |
| C <sub>4</sub> SH(D) | 654 (661)   | 610 (610)   | 627 (627) | $\nu_{CS-G}$      |
|                      | 732 (745)   | 702 (702)   | 698 (698) | $\nu_{CS-T}$      |
|                      | 846 (614)   | -           |           | $\beta_{CSH/CSD}$ |
